Development 135, 787 (2008) doi:10.1242/dev.020263

An endogenous Su(Hw) insulator separates the *yellow* gene from the *Achaete-scute* gene complex in *Drosophila*

**Anton Golovnin, Inna Biryukova, Olga Romanova, Margarita Silicheva, Aleksander Parshikov, Ekaterina Savitskaya, Vincenzo Pirrotta and Pavel Georgiev**

There was an error published in *Development* **130**, 3249-3258.

The name of the second author, Inna Biryukova, was published incorrectly. The name is correct as written above.

The authors apologise to readers for this mistake.
